# Supplementary material for: Genetic diversity of Bordetella bronchiseptica isolates obtained from primates
Source: Front Microbiol. 2025 Jun 26;16:1571660. doi: 10.3389/fmicb.2025.1571660 (PMC12243275; doi:10.3389/fmicb.2025.1571660)
Supplement: Supplementary file 5 [file Data_Sheet_2.xlsx]

## Sheet: Percent Identity
Isolate Name	Host	ST	Lineage	bipA	bopB	bopD	bopN	brkA	bsp22	bteA	bvgA	bvgR	bvgS	cyaA	cyaB	cyaC	cyaD	cyaE	cyaX	dnt	fhaB	fhaC	fhaL	fhaS	fim2	fim2-like	fim3	fimA	fimB	fimC	fimD	fimN	fimX	flaA	fimbrial protein 1	fimbrial protein 2	prn	ptxA	ptxB	ptxC	ptxD	ptxE	bcfA_putative adhesin_1	putative adhesin_2	vag8	T6SS-1	T6SS-2	T6SS-3	T6SS-4
M2020-4	Baboon	67	II	90.53	90.27	90.87	93.08	92.38	93.85	95.7	95.08	88.93	90.25	NP	NP	NP	NP	NP	95.6	NP	85.549	94.19	89.948	61.53	87.52	82.51	93.62	94.22	95.39	93.94	94.61	NP	87.95	89.02	NP	95.71	66.82	94.2	97.36	96.34	98.69	99.72	NP	NP	NP	NP	NP	NP	NP
M2020-2	Baboon	67	II	90.53	90.27	90.87	93.08	92.38	93.85	95.7	95.08	88.93	90.49	NP	NP	NP	NP	NP	95.6	NP	85.549	94.19	89.948	61.53	87.52	82.51	93.62	94.22	95.39	93.94	94.61	NP	87.95	89.02	NP	95.71	66.82	94.2	97.36	96.34	98.69	99.72	NP	NP	NP	NP	NP	NP	NP
M2020-1	Baboon	111	I-1	99.77	100	99.89	99.91	99.8	99.84	99.9	100	100	99.76	99.44	99.95	98.81	100	99.72	100	99.75	95.542	99.2	98.642	98.846	99.84	100	99.68	99.83	99.52	99.35	99.45	99.68	100	90.14	93.33	99.83	99.38	97.78	98.24	91.67	96.3	96.14	99.86	99.88	99.78	99.91	99.82	99.87	100
M2020-5	Baboon	111	I-1	99.77	100	99.89	99.91	99.8	99.84	99.9	100	100	99.76	99.44	99.95	98.81	100	99.72	100	99.75	95.542	99.2	98.642	98.846	99.84	100	99.68	99.83	99.52	99.35	99.45	99.68	100	90.14	93.33	99.83	99.38	97.78	98.24	91.67	96.3	96.14	99.86	99.88	99.78	99.91	99.82	99.87	100
M2020-3	Baboon	111	I-1	99.77	100	99.89	99.91	99.8	99.84	99.9	100	100	99.76	99.44	99.95	98.81	100	99.72	100	99.75	95.542	99.2	98.642	98.846	99.84	100	99.68	99.83	99.52	99.35	99.45	99.68	100	90.14	93.33	99.83	99.38	97.78	98.24	91.67	96.3	96.14	99.86	99.88	99.78	99.91	99.82	99.87	100
C2020-8	Rhesus monkey	109	I-1	99.77	99.92	100	99.73	99.74	100	99.95	100	100	99.97	99.77	99.91	98.98	99.92	99.65	100	99.82	94.672	99.37	99.466	98.16	99.84	100	99.68	99.83	99.64	99.43	99.73	100	100	90.14	93.33	99.67	98.87	97.78	98.24	91.67	96.3	96.14	99.79	99.948	99.82	99.91	100	99.87	100
C2020-1	Rhesus monkey	109	I-1	99.77	99.92	100	99.73	99.74	100	99.95	100	100	99.97	99.77	99.91	98.98	99.92	99.65	100	99.82	94.672	99.37	99.466	98.16	99.84	100	99.68	99.83	99.64	99.43	99.73	100	100	90.14	93.33	99.67	98.87	97.78	98.24	91.67	96.3	96.14	99.79	99.948	99.82	INC	100	99.87	100
C2020-2	Rhesus monkey	109	I-1	99.77	99.92	100	99.73	99.74	100	99.95	99.84	100	99.97	99.77	99.91	98.98	99.92	99.65	100	99.82	94.672	99.37	99.466	98.16	99.84	100	99.68	99.83	99.64	99.43	99.73	100	100	90.14	93.33	99.67	98.87	97.78	98.24	91.67	96.3	96.14	99.79	99.948	99.82	99.91	100	99.87	100
C2020-3	Rhesus monkey	109	I-1	99.77	99.92	100	99.73	99.74	100	99.95	100	100	99.97	99.77	99.91	98.98	99.92	99.65	100	99.82	94.672	99.37	99.466	98.16	99.84	100	99.68	99.83	99.64	99.43	99.73	100	100	90.14	93.33	99.67	98.87	97.78	98.24	91.67	96.3	96.14	99.79	99.948	99.82	99.91	100	99.87	100
C2020-4	Rhesus monkey	109	I-1	99.77	99.92	100	99.73	99.74	100	99.95	100	100	99.97	99.77	99.91	98.98	99.92	99.65	100	99.82	94.672	99.37	99.466	98.16	99.84	100	99.68	99.83	99.64	99.43	99.73	100	100	90.14	93.33	99.67	98.87	97.78	98.24	91.67	96.3	96.14	99.79	99.948	99.82	99.91	100	99.87	100
C2020-5	Rhesus monkey	109	I-1	99.77	99.92	100	99.73	99.74	100	99.95	100	100	99.97	99.77	99.91	98.98	99.92	99.65	100	99.82	94.672	99.37	99.466	98.16	99.84	100	99.68	99.83	99.64	99.43	99.73	100	100	90.14	93.33	99.67	98.87	97.78	98.24	91.67	96.3	96.14	99.79	99.948	99.82	99.91	100	99.87	100
C2020-9	Rhesus monkey	109	I-1	99.77	99.92	100	99.73	99.74	100	99.95	100	100	99.97	99.77	99.91	98.98	99.92	99.65	100	99.82	94.672	99.37	99.466	98.16	99.84	100	99.68	99.83	99.64	99.43	99.73	100	100	90.14	93.33	99.67	98.87	97.78	98.24	91.67	96.3	96.14	99.79	99.948	99.82	99.91	100	99.87	100
C2020-10	Rhesus monkey	109	I-1	99.77	99.92	100	99.73	99.74	100	99.95	100	100	99.97	99.77	99.91	98.98	99.92	99.65	100	99.82	94.672	99.37	99.466	98.16	99.84	100	99.68	99.83	99.64	99.43	99.73	100	100	90.14	93.33	99.67	98.87	97.78	98.24	91.67	96.3	96.14	99.79	99.948	99.82	99.91	100	99.87	100
C2020-11	Rhesus monkey	109	I-1	99.77	99.92	100	99.73	99.74	100	99.95	100	100	99.97	99.77	99.91	98.98	99.92	99.65	100	99.82	94.672	99.37	99.466	98.16	99.84	100	99.68	99.83	99.64	99.43	99.73	100	100	90.14	93.33	99.67	98.87	97.78	98.24	91.67	96.3	96.14	99.79	99.948	99.82	99.91	100	99.87	100
C2020-12	Rhesus monkey	109	I-1	99.77	99.92	100	99.73	99.74	100	99.95	100	100	99.97	99.77	99.91	98.98	99.92	99.65	100	99.82	94.672	99.37	99.466	98.16	99.84	100	99.68	99.83	99.64	99.43	99.73	100	100	90.14	93.33	99.67	98.87	97.78	98.24	91.67	96.3	96.14	99.79	99.948	99.82	99.91	100	99.87	100
C2020-13	Rhesus monkey	109	I-1	99.77	99.92	100	99.73	99.74	100	99.95	100	100	99.97	99.77	99.91	98.98	99.92	99.65	100	99.82	94.672	99.37	99.466	98.16	99.84	100	99.68	99.83	99.64	99.43	99.73	100	100	90.14	93.33	99.67	98.87	97.78	98.24	91.67	96.3	96.14	99.79	99.948	99.82	99.91	100	99.87	100
C2020-14	Rhesus monkey	109	I-1	99.77	99.92	100	99.73	99.74	100	99.95	100	100	99.97	99.77	99.91	98.98	99.92	99.65	100	99.82	94.672	99.37	99.466	98.16	99.84	100	99.68	99.83	99.64	99.43	99.73	100	100	90.14	93.33	99.67	98.87	97.78	98.24	91.67	96.3	96.14	99.79	99.948	99.82	99.91	100	99.87	100
C2020-15	Rhesus monkey	109	I-1	99.77	99.92	100	99.73	99.74	100	99.95	100	100	99.97	99.77	99.91	98.98	99.92	99.65	100	99.82	94.672	99.37	99.466	98.16	99.84	100	99.68	99.83	99.64	99.43	99.73	100	100	90.14	93.33	99.67	98.87	97.78	98.24	91.67	96.3	96.14	99.79	99.948	99.82	99.91	100	99.87	100
C2020-7	Rhesus monkey	33	I-1	99.75	100	99.79	99.73	99.87	100	99.95	100	99.89	99.81	99.41	99.81	98.98	99.92	99.58	99.89	NP	94.575	99.26	98.614	98.877	99.69	100	99.84	99.83	99.64	99.58	99.64	100	100	90.06	93.33	99.83	99.56	97.78	98.24	91.67	96.3	96.14	99.79	99.931	99.82	100	100	99.93	100
RB50	Rabbit	12	I-1	99.85	100	99.89	99.91	99.74	100	99.95	99.84	99.89	99.68	99.43	99.81	98.81	99.92	99.58	99.89	99.73	95.434	99.31	98.626	98.774	99.84	NP	99.84	99.83	99.64	99.39	99.73	88.82	99.83	89.19	NP	99.67	98.59	97.65	98.24	91.67	96.3	96.14	99.83	NP	99.75	100	99.82	99.93	100
KM22	Pig	7	I-1	100	100	100	100	100	100	100	100	100	100	100	100	100	100	100	100	100	100	100	100	100	100	100	100	100	100	100	100	100	100	100	100	100	100	100	100	100	100	100	100	100	100	100	100	100	100
[truncated: 15 more columns]

## Sheet: Locus_tags
Isolate Name	Host	ST	Lineage	bipA	bopB	bopD	bopN	brkA	bsp22	bteA	bvgA	bvgR	bvgS	cyaA	cyaB	cyaC	cyaD	cyaE	cyaX	dnt	fhaB	fhaC	fhaL	fhaS	fim2	fim2-like	fim3	fimA	fimB	fimC	fimD	fimN	fimX	flaA	fimbrial protein 1	fimbrial protein 2	prn	ptxA	ptxB	ptxC	ptxD	ptxE	bcfA_putative adhesin_1	putative adhesin_2	vag8	T6SS-1	T6SS-2	T6SS-3	T6SS-4
MDA2020-4	Baboon	67	II	QCN28_09520	QCN28_15860	QCN28_15865	QCN28_15885	QCN28_19820	QCN28_15880	QCN28_03795	QCN28_12855	QCN28_12865	QCN28_12860	NP	NP	NP	NP	NP	QCN28_22670	NP	QCN28_12850	QCN28_12825	QCN28_07950	QCN28_09565	QCN28_06735	QCN28_07350	QCN28_15660	QCN28_12845	QCN28_12840	QCN28_12835	QCN28_12830	NP	QCN28_07345	QCN28_10690	NP	QCN28_13855	QCN28_02005	QCN28_00510	QCN28_00505	QCN28_00490	QCN28_00500	QCN28_00495	NP	NP	NP	NP	NP	NP	NP
MDA2020-2	Baboon	67	II	QCI76_09520	QCI76_15860	QCI76_15865	QCI76_15885	QCI76_19820	QCI76_15880	QCI76_03795	QCI76_12855	QCI76_12865	QCI76_12860	NP	NP	NP	NP	NP	QCI76_22670	NP	QCI76_12850	QCI76_12825	QCI76_07950	QCI76_09565	QCI76_06735	QCI76_07350	QCI76_15660	QCI76_12845	QCI76_12840	QCI76_12835	QCI76_12830	NP	QCI76_07345	QCI76_10690	NP	QCI76_13855	QCI76_02005	QCI76_00510	QCI76_00505	QCI76_00490	QCI76_00500	QCI76_00495	NP	NP	NP	NP	NP	NP	NP
MDA2020-1	Baboon	111	I-1	QJT97_09970	QJT97_16390	QJT97_116395	QJT97_16415	QJT97_19745	QJT97_16410	QJT97_04335	QJT97_13395	QJT97_13405	QJT97_13400	QJT97_23015	QJT97_23010	QJT97_23025	QJT97_23005	QJT97_23000	QJT97_22995	QJT97_05570	QJT97_13390	QJT97_13365	QJT97_08390	QJT97_13250	QJT97_07130	QJT97_07790	QJT97_16200	QJT97_13385	QJT97_13380	QJT97_13375	QJT97_13370	QJT97_07795	QJT97_07785	QJT97_11130	QJT97_07800	QJT97_14415	QJT97_17680	QJT97_00510	QJT97_00505	QJT97_00490	QJT97_00500	QJT97_00495	QJT97_24080	QJT97_24115	QJT97_08025	QJT97_20580	QJT97_20575	QJT97_20570	QJT97_20565
MDA2020-5	Baboon	111	I-1	QJT93_21485	QJT93_08000	QJT93_07995	QJT93_07975	QJT93_07395	QJT93_07980	QJT93_17820	QJT93_18785	QJT93_18775	QJT93_18780	QJT93_08870	QJT93_08875	QJT93_08860	QJT93_08880	QJT93_08885	QJT93_08890	QJT93_05305	INC	QJT93_11960	INC	INC	QJT93_20985	QJT93_20940	QJT93_08190	QJT93_11940	QJT93_11945	QJT93_11950	QJT93_11955	QJT93_20945	QJT93_20935	QJT93_23780	QJT93_18265	QJT93_10650	QJT93_23520	QJT93_05610	QJT93_05605	QJT93_05590	QJT93_05600	QJT93_05595	QJT93_00800	QJT93_00835	QJT93_11925	QJT93_23945	QJT93_23950	QJT93_23955	QJT93_23960
MDA2020-3	Baboon	111	I-1	QJT90_21175	QJT90_05135	QJT90_05140	QJT90_05160	QJT90_07425	QJT90_05155	QJT90_17570	QJT90_18425	QJT90_18415	QJT90_18420	QJT90_08235	QJT90_08240	QJT90_08225	QJT90_08245	QJT90_08250	QJT90_08255	QJT90_16360	INC	QJT90_11860	INC	INC	QJT90_20360	QJT90_12735	QJT90_04945	QJT90_11840	QJT90_11845	QJT90_11850	QJT90_11855	QJT90_12740	QJT90_12730	QJT90_22965	QJT90_12745	QJT90_09590	QJT90_23240	QJT90_10630	QJT90_10625	QJT90_10610	QJT90_10620	QJT90_10615	QJT90_00410	QJT90_00445	QJT90_13970	QJT90_23070	QJT90_23065	QJT90_23060	QJT90_23055
CBER2020-8	Rhesus monkey	109	I-1	QCI01_09865	QCI01_16275	QCI01_16280	QCI01_16300	QCI01_19600	QCI01_16295	QCI01_03845	QCI01_13280	QCI01_13290	QCI01_13285	QCI01_22740	QCI01_22735	QCI01_22750	QCI01_22730	QCI01_22725	QCI01_22720	QCI01_05085	QCI01_13275	QCI01_13250	QCI01_07970	QCI01_09910	QCI01_06705	QCI01_07365	QCI01_16085	QCI01_13270	QCI01_13265	QCI01_13260	QCI01_13255	QCI01_07370	QCI01_07360	QCI01_11045	QCI01_07375	QCI01_14300	QCI01_17565	QCI01_00285	QCI01_00505	QCI01_00490	QCI01_00500	QCI01_00495	QCI01_23805	QCI01_23840	QCI01_07600	QCI01_20365	QCI01_20360	QCI01_20355	QCI01_20350
CBER2020-1	Rhesus monkey	109	I-1	QJT94_21225	QJT94_10320	QJT94_10325	QJT94_10345	QJT94_09070	QJT94_10340	QJT94_17715	QJT94_13140	QJT94_13150	QJT94_13145	QJT94_11195	QJT94_11200	QJT94_11185	QJT94_11205	QJT94_11210	QJT94_11215	QJT94_08750	INC	QJT94_08100	INC	INC	QJT94_15150	QJT94_13095	QJT94_10130	QJT94_08120	QJT94_08115	QJT94_08110	QJT94_08105	QJT94_13100	QJT94_13090	QJT94_14805	QJT94_13105	QJT94_24560	QJT94_07065	QJT94_15450	QJT94_15455	QJT94_15470	QJT94_15460	QJT94_15465	QJT94_06980	INC	QJT94_06450	INC	QJT94_23160	QJT94_23165	QJT94_23170
CBER2020-2	Rhesus monkey	109	I-1	QJT91_23780	QJT91_10370	QJT91_10365	QJT91_10345	QJT91_09505	QJT91_10350	QJT91_17490	QJT91_13555	QJT91_13565	QJT91_13560	QJT91_15135	QJT91_15130	QJT91_15145	QJT91_15125	QJT91_15120	QJT91_15115	QJT91_09015	INC	QJT91_04050	INC	INC	QJT91_15555	QJT91_12870	QJT91_10560	QJT91_04030	QJT91_04035	QJT91_04040	QJT91_04045	QJT91_12865	QJT91_12875	QJT91_18125	QJT91_12860	QJT91_03145	QJT91_22000	QJT91_04410	QJT91_04405	QJT91_04390	QJT91_04400	QJT91_04395	QJT91_07285	INC	QJT91_06400	QJT91_22625	QJT91_22630	QJT91_22635	QJT91_22640
CBER2020-3	Rhesus monkey	109	I-1	QJU52_21370	QJU52_04930	QJU52_04925	QJU52_04905	QJU52_10945	QJU52_04910	QJU52_21155	QJU52_13435	QJU52_13445	QJU52_13440	QJU52_02700	QJU52_02695	QJU52_02710	QJU52_02690	QJU52_02685	QJU52_02680	QJU52_08970	INC	QJU52_04355	INC	INC	QJU52_15350	QJU52_09510	QJU52_05120	QJU52_04375	QJU52_04370	QJU52_04365	QJU52_04360	QJU52_09505	QJU52_09515	QJU52_22230	QJU52_09500	QJU52_03190	QJU52_13175	QJU52_09790	QJU52_09795	QJU52_09810	QJU52_09800	QJU52_09805	QJU52_06940	INC	QJU52_06060	QJU52_22520	QJU52_22515	QJU52_22510	QJU52_22505
CBER2020-4	Rhesus monkey	109	I-1	QJU00_22430	QJU00_01565	QJU00_01570	QJU00_01590	QJU00_06015	QJU00_01585	QJU00_16585	QJU00_17700	QJU00_17690	QJU00_17695	QJU00_06535	QJU00_06530	QJU00_06545	QJU00_06525	QJU00_06520	QJU00_06515	QJU00_14865	INC	QJU00_10095	INC	INC	QJU00_19805	QJU00_15130	QJU00_01375	QJU00_10075	QJU00_10080	QJU00_10085	QJU00_10090	QJU00_15125	QJU00_15135	QJU00_17265	QJU00_15120	QJU00_09190	QJU00_13095	QJU00_08805	QJU00_08800	QJU00_08785	QJU00_08795	QJU00_08790	QJU00_12815	INC	QJU00_12775	QJU00_23525	QJU00_23530	QJU00_23535	QJU00_23540
CBER2020-5	Rhesus monkey	109	I-1	QJT89_22460	QJT89_10395	QJT89_10400	QJT89_10420	QJT89_04910	QJT89_10415	QJT89_16780	QJT89_17655	QJT89_17665	QJT89_17660	QJT89_05965	QJT89_05960	QJT89_05975	QJT89_05955	QJT89_05950	QJT89_05945	QJT89_14675	INC	QJT89_09500	INC	INC	QJT89_19630	QJT89_11445	QJT89_10205	QJT89_09520	QJT89_09515	QJT89_09510	QJT89_09505	QJT89_11440	QJT89_11450	QJT89_19340	QJT89_11435	QJT89_07925	QJT89_09965	QJT89_07780	QJT89_07785	QJT89_07800	QJT89_07790	QJT89_07795	QJT89_06565	INC	QJT89_12630	QJT89_22665	QJT89_22660	QJT89_22655	QJT89_22650
CBER2020-9	Rhesus monkey	109	I-1	QJU01_21675	QJU01_06900	QJU01_06905	QJU01_06925	QJU01_12110	QJU01_06920	QJU01_14840	QJU01_15310	QJU01_15320	QJU01_15315	QJU01_03690	QJU01_03685	QJU01_03700	QJU01_03680	QJU01_03675	QJU01_03670	QJU01_11845	INC	QJU01_05925	INC	INC	QJU01_16975	QJU01_12410	QJU01_06710	QJU01_05945	QJU01_05940	QJU01_05935	QJU01_05930	QJU01_12415	QJU01_12405	QJU01_18990	QJU01_12420	QJU01_05145	QJU01_22030	QJU01_06335	QJU01_06330	QJU01_06315	QJU01_06325	QJU01_06320	QJU01_09605	INC	QJU01_09055	QJU01_22775	QJU01_22770	QJU01_22765	QJU01_22760
CBER2020-10	Rhesus monkey	109	I-1	QJT84_21150	QJT84_07620	QJT84_07625	QJT84_07645	QJT84_11820	QJT84_07640	QJT84_14955	QJT84_15420	QJT84_15430	QJT84_15425	QJT84_04735	QJT84_04740	QJT84_04725	QJT84_04745	QJT84_04750	QJT84_04755	QJT84_11580	INC	QJT84_05965	INC	INC	QJT84_17260	QJT84_08345	QJT84_07430	QJT84_05945	QJT84_05950	QJT84_05955	QJT84_05960	QJT84_08350	QJT84_08340	QJT84_16805	QJT84_08355	QJT84_05120	QJT84_21735	QJT84_07385	QJT84_07390	QJT84_07405	QJT84_07395	QJT84_07400	QJT84_09800	INC	QJT84_09155	QJT84_22505	QJT84_22500	QJT84_22495	QJT84_22490
CBER2020-11	Rhesus monkey	109	I-1	QJT98_24125	QJT98_05335	QJT98_05340	QJT98_05360	QJT98_13815	QJT98_05355	QJT98_16245	QJT98_17070	QJT98_17080	QJT98_17075	QJT98_03035	QJT98_03030	QJT98_03045	QJT98_03025	QJT98_03020	QJT98_03015	QJT98_13630	INC	QJT98_06835	INC	INC	QJT98_19275	QJT98_09585	QJT98_05145	QJT98_06815	QJT98_06820	QJT98_06825	QJT98_06830	QJT98_09590	QJT98_09580	QJT98_15070	QJT98_09595	QJT98_06410	QJT98_19980	QJT98_08690	QJT98_08685	QJT98_08670	QJT98_08680	QJT98_08675	QJT98_11060	INC	QJT98_11015	QJT98_23330	QJT98_23325	QJT98_23320	QJT98_23315
CBER2020-12	Rhesus monkey	109	I-1	QJT88_20800	QJT88_03685	QJT88_03680	QJT88_03660	QJT88_12785	QJT88_03665	QJT88_17735	QJT88_20365	QJT88_20355	QJT88_20360	QJT88_13295	QJT88_13300	QJT88_13285	QJT88_13305	QJT88_13310	QJT88_13315	QJT88_00175	INC	QJT88_17330	INC	INC	QJT88_22585	QJT88_19295	QJT88_03875	QJT88_17310	QJT88_17315	QJT88_17320	QJT88_17325	QJT88_19300	QJT88_19290	QJT88_08140	QJT88_19305	QJT88_09530	QJT88_06695	QJT88_08965	QJT88_08970	QJT88_08985	QJT88_08975	QJT88_08980	QJT88_6735	INC	QJT88_02350	QJT88_23925	QJT88_23920	QJT88_23915	QJT88_23910
CBER2020-13	Rhesus monkey	109	I-1	QJT86_23735	QJT86_04740	QJT86_04735	QJT86_04715	QJT86_13205	QJT86_04720	QJT86_22005	QJT86_20535	QJT86_20525	QJT86_20530	QJT86_13490	QJT86_13495	QJT86_13480	QJT86_13500	QJT86_13505	QJT86_13510	QJT86_01130	INC	QJT86_17240	INC	INC	QJT86_22910	QJT86_18875	QJT86_04930	QJT86_17220	QJT86_17225	QJT86_17230	QJT86_17235	QJT86_18870	QJT86_18880	QJT86_09255	QJT86_18865	QJT86_16745	QJT86_06520	QJT86_08000	QJT86_07995	QJT86_07980	QJT86_07990	QJT86_07985	QJT86_07070	INC	QJT86_03405	QJT86_23950	QJT86_23945	QJT86_23940	QJT86_23935
CBER2020-14	Rhesus monkey	109	I-1	QJT85_07365	QJT85_10480	QJT85_10485	QJT85_10505	QJT85_12230	QJT85_10500	QJT85_21785	QJT85_20285	QJT85_20275	QJT85_20280	QJT85_13570	QJT85_13565	QJT85_13580	QJT85_13560	QJT85_13555	QJT85_13550	QJT85_01575	INC	QJT85_16155	INC	INC	QJT85_22735	QJT85_17045	QJT85_10290	QJT85_16135	QJT85_16140	QJT85_16145	QJT85_16150	QJT85_17050	QJT85_17040	QJT85_09680	QJT85_17055	QJT85_08480	QJT85_19045	QJT85_07545	QJT85_07540	QJT85_07525	QJT85_07535	QJT85_07530	QJT85_06485	INC	QJT85_00005	QJT85_23880	QJT85_23885	QJT85_23890	QJT85_23895
CBER2020-15	Rhesus monkey	109	I-1	QJT83_23680	QJT83_03735	QJT83_03740	QJT83_03760	QJT83_12685	QJT83_03755	QJT83_21540	QJT83_21825	QJT83_21815	QJT83_21820	QJT83_12970	QJT83_12975	QJT83_12960	QJT83_12980	QJT83_12985	QJT83_12990	QJT83_01130	INC	QJT83_16025	INC	INC	QJT83_22565	QJT83_11020	QJT83_03545	QJT83_16045	QJT83_16040	QJT83_16035	QJT83_16030	QJT83_11015	QJT83_11025	QJT83_07315	QJT83_11010	QJT83_14795	QJT83_16140	QJT83_06055	QJT83_06050	QJT83_06035	QJT83_06045	QJT83_06040	QJT83_05125	INC	QJT83_02350	QJT83_24320	QJT83_24315	QJT83_24310	QJT83_24305
CBER2020-7	Rhesus monkey	33	I-1	QJT87_09490	QJT87_16120	QJT87_16125	QJT87_16145	QJT87_19500	QJT87_16140	QJT87_03845	QJT87_13090	QJT87_13100	QJT87_13095	QJT87_22660	QJT87_22655	QJT87_22665	QJT87_22650	QJT87_22645	QJT87_22640	NP	QJT87_13085	QJT87_13060	QJT87_07905	QJT87_09535	QJT87_06645	QJT87_07305	QJT87_15930	QJT87_13080	QJT87_13075	QJT87_13070	QJT87_13065	QJT87_07310	QJT87_07300	QJT87_10780	QJT87_07315	QJT87_14150	QJT87_17410	QJT87_00510	QJT87_00505	QJT87_00490	QJT87_00500	QJT87_00495	QJT87_23720	QJT87_23755	QJT87_07540	QJT87_20265	QJT87_20260	QJT87_20255	QJT87_20250
RB50	Rabbit	12	I-1	BB2303	BB1621	BB1620	BB1616	BB0961	BB1617	BB4228	BB2994	BB2996	BB2995	BB0324	BB0325	BB0323	BB0326	BB0327	BB0328	BB3978	BB2993	BB2988	BB1936	BB2312	BB3674	NP	BB1658	BB2992	BB2991	BB2990	BB2989	BB3425	BB3426	BB2539	NP	BB3193	BB1366	BB4890	BB4891	BB4894	BB4892	BB4893	BB0110	NP	BB1864	BB0799	BB0800	BB0801	BB0802
KM22	Pig	7	I-1	CJ015_13295	CJ015_16255	CJ015_16260	CJ015_16280	CJ015_19610	CJ015_16275	CJ015_03825	C015_09860	CJ015_09850	CJ015_09855	CJ015_22725	CJ015_22720	CJ015_22735	CJ015_22715	CJ015_22710	CJ015_22705	CJ015_05050	CJ015_09865	CJ015_09890	CJ015_14895	CJ015_13250	CJ015_06680	CJ015_07645	CJ015_16060	CJ015_09870	CJ015_09875	CJ015_09880	CJ015_09885	CJ015_07650	CJ015_07640	CJ015_12125	CJ015_07655	CJ015_08855	CJ015_17560	CJ015_00500	CJ015_00495	CJ015_00480	CJ015_00490	CJ015_00485	CJ015_23785	CJ015_23820	CJ015_15265	CJ015_20430	CJ015_20425	CJ015_20420	CJ015_20415
[truncated: 15 more columns]
